# Supplementary material
Source: publisher figshare collection journal article supplement (https://acs.figshare.com/ndownloader/files/4931401)
Supplement: Supplementary file 1 [file 4931401]

## **Supporting Information**

### **P450 3A Catalyzed O-dealkylation of Lapatinib Induces Mitochondrial Stress and Activates Nrf2**

Marsha Rebecca Eno<sup>§</sup>, Bahaa El-Dien M El-Gendy<sup>||</sup>, and Michael D. Cameron<sup>§\*</sup>,

<sup>§</sup>Department of Molecular Therapeutics, The Scripps Research Institute, Scripps Florida, 130 Scripps Way, Jupiter, Florida 33458, United States, <sup>||</sup>Chemistry Department, Faculty of Science, Benha University, Benha 13518, Egypt.

## **Table of Contents**

Table S1: Primer sequences of Nrf-2 target genes

Table S2: LC (Shimadzu UFLC XR) conditions of lapatinib or OD-lapatinib

Table S3: Gradient elution conditions

Table S4: MS (API 5500) conditions of lapatinib or OD-lapatinib

| <b>Table S1: Primer sequences for Nrf-2 target genes</b> | <b>Forward (5'-3')</b> | <b>Reverse (5'-3')</b> |
|----------------------------------------------------------|------------------------|------------------------|
| <b>GAPDH</b>                                             | GGGTGTGAACCATGAGAAG    | GTCCTTCCACGATACCAAAG   |
| <b>HO-1</b>                                              | CCAAGTTCAAGCAGCTCTAC   | CCTCAAAGAGCTGGATGTTG   |
| <b>NQO-1</b>                                             | CAGCGGCTTTGAAGAAGA     | GCAGGGTCCTTCAGTTTA     |
| <b>UGT1A1</b>                                            | AGAGGTGACTGTCCAGGACC   | TAGGCTTCAAATTCCTGGGA   |
| <b>SOD1</b>                                              | GCAGGTCCTCACTTTAATCC   | GCCACACCATCTTTGTCA     |
| <b>SOD2</b>                                              | GGGTTGGCTTGGTTTCAA     | GTGCTCCCACACATCAATC    |

## **I. Analytical Procedures:**

1. Prepared plasma quantitation standards at 2, 10, 20, 40, 100, 200, 500, 1000 and 2000 ng/ml and QC solutions at 10, 100 and 1000 ng/mL by spiking 25  $\mu$ L mixed lapatinib and OD-lapatinib standard or QC acetonitrile stock solutions to 225  $\mu$ L blank plasma samples, mixed well.
2. Prepared liver quantitation standards at 1, 5, 10, 20, 50, 100, 250, 500 and 1000 ng/ml and QC solutions at 5, 50 and 500 ng/mL by spiking 10  $\mu$ L mixed lapatinib and OD-lapatinib standard or QC acetonitrile stock solutions to 190 $\mu$ L blank liver tissue matrix, mixed well. Blank liver matrix was generated by spiking 900ul water to each 100 mg blank liver and homogenized.
3. All plasma samples were diluted either 10 or 50-fold (5  $\mu$ L sample + 45 or 245  $\mu$ L blank plasma) before analysis. Liver samples were first diluted 10-fold by spiking 900ul water to each 100 mg sample and homogenized, then further diluted another 50- fold using blank liver matrix. The total dilutions for liver samples were 500-fold.
4. For plasma and liver samples respectively, transferred 25  $\mu$ L each of standards, QCs or samples to a 96 well filter plate, added 100  $\mu$ L internal standard solution (5ng/mL Carbamazepine in acetonitrile), mixed well then filtered. The filtrates were ready for analysis.
5. All samples were analyzed by LC-MS/MS (API 5500) and quantified using an internal calibration method. MRMs(+) (582.1/366.1 or 473.2/349.8, m/z) were used to scan for lapatinib or OD-lapatinib. Carbamazepine (238/195.1, m/z) was used as internal standard.
6. LLOQ and calibration linear range for lapatinib or OD-lapatinib plasma sample analysis were 2 ng/ml and 2 – 2000 ng/ml, respectively. LLOQ and calibration linear range for lapatinib or OD-lapatinib liver sample analysis were 5ng/ml and 5 – 1000 ng/ml, respectively.

## II. Instrument Settings

Table S2: LC (Shimadzu UFLC XR) conditions of lapatinib or OD-lapatinib

|                       |                                                                         |      |
|-----------------------|-------------------------------------------------------------------------|------|
| Compound              | lapatinib or OD-lapatinib                                               | I.S. |
| Column                | Thermo Betasil C18, 50x2.1 mm, 5u                                       |      |
| Mobile phase          | A: Water with 0.1% Formic Acid<br>B: Acetonitrile with 0.1% Formic Acid |      |
| Flow rate (ml/min)    | 0.35                                                                    |      |
| Temperature (°C)      | 35                                                                      |      |
| Injection volume (μl) | 5                                                                       |      |
| t <sub>R</sub> (min)  | 2.33 or 2.14                                                            | 2.52 |

Table S3: Gradient elution conditions

| Time (min) | Mobile phase A (%) | Mobile phase B (%) |
|------------|--------------------|--------------------|
| 0.2        | 90                 | 10                 |
| 0.5        | 90                 | 10                 |
| 2.0        | 5                  | 95                 |
| 3.0        | 5                  | 95                 |
| 4.0        | 90                 | 10                 |
| 5.9        | 90                 | 10                 |

Table S4: MS (API 5500) conditions of lapatinib or OD-lapatinib

| Compound        | lapatinib or OD-lapatinib  | I.S.      |
|-----------------|----------------------------|-----------|
| MRM (+)         | 582.1/366.1 or 473.2/349.8 | 238/195.1 |
| CAD             | 7                          |           |
| Curtain GAS     | 20                         |           |
| Ion Source Gas1 | 40                         |           |
| Ion Source Gas2 | 40                         |           |
| IS              | 5500                       |           |
| TEM             | 500                        |           |
| CE              | 55                         | 42        |
| DP              | 170                        | 126       |
| EP              | 10                         |           |
| CXP             | 14                         | 14        |
